# Supplementary material for: Impact of nutrition and rotavirus infection on the infant gut microbiota in a humanized pig model
Source: PubMed Central journal article supplement (PMC6013989; doi:10.1186/s12876-018-0810-2), 2018-06-22
Supplement: 12876_2018_810_MOESM4_ESM.pdf [file 12876_2018_810_MOESM4_ESM.pdf]

### Non-HRV challenged duodenum

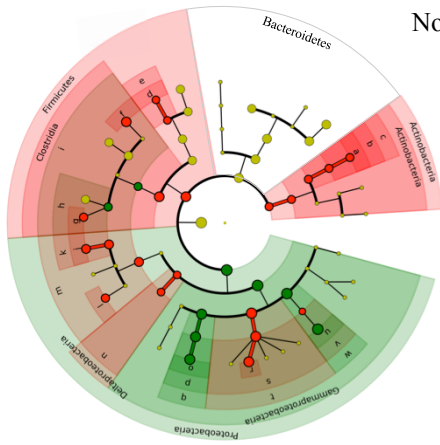

■ Deficient diet  
■ Sufficient diet

#### Abbreviations

- |                                                          |                                                               |
|----------------------------------------------------------|---------------------------------------------------------------|
| <span style="color: red;">■</span> a: Bifidobacterium    | <span style="color: red;">■</span> n: Myxococcales            |
| <span style="color: red;">■</span> b: Bifidobacteriaceae | <span style="color: green;">■</span> o: Shewanella            |
| <span style="color: red;">■</span> c: Bifidobacteriales  | <span style="color: green;">■</span> p: Shewanellaceae        |
| <span style="color: red;">■</span> d: Lactobacillus      | <span style="color: green;">■</span> q: Alteromonadales       |
| <span style="color: red;">■</span> e: Lactobacillaceae   | <span style="color: red;">■</span> r: EnterobacteriaceaeOther |
| <span style="color: red;">■</span> f: Clostridium        | <span style="color: red;">■</span> s: Enterobacteriaceae      |
| <span style="color: red;">■</span> g: Oscillospira       | <span style="color: red;">■</span> t: Enterobacteriales       |
| <span style="color: green;">■</span> h: Ruminococcaceae  | <span style="color: green;">■</span> u: Halomonas             |
| <span style="color: red;">■</span> i: Clostridiales      | <span style="color: red;">■</span> v: Halomonadaceae          |
| <span style="color: red;">■</span> j: Burkholderia       | <span style="color: green;">■</span> w: Oceanospirillales     |
| <span style="color: red;">■</span> k: Burkholderiaceae   |                                                               |
| <span style="color: red;">■</span> l: Ralstonia          |                                                               |
| <span style="color: red;">■</span> m: Burkholderiales    |                                                               |

### Non-HRV challenged jejunum

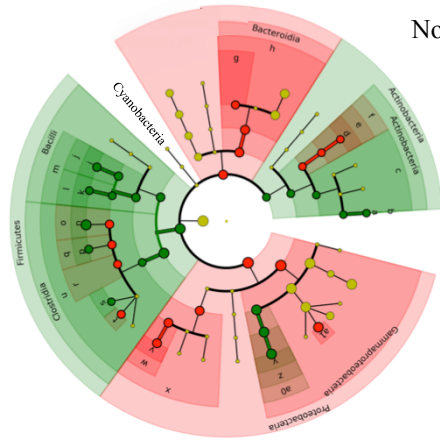

■ Deficient diet  
■ Sufficient diet

#### Abbreviations

- |                                                            |                                                             |                                                                |
|------------------------------------------------------------|-------------------------------------------------------------|----------------------------------------------------------------|
| <span style="color: green;">■</span> a: Corynebacterium    | <span style="color: red;">■</span> n: Clostridium           | <span style="color: green;">■</span> a0: Alteromonadales       |
| <span style="color: green;">■</span> b: Corynebacteriaceae | <span style="color: red;">■</span> o: Clostridiaceae        | <span style="color: red;">■</span> a1: EnterobacteriaceaeOther |
| <span style="color: green;">■</span> c: Actinomycetales    | <span style="color: green;">■</span> p: Ruminococcus        |                                                                |
| <span style="color: red;">■</span> d: Bifidobacterium      | <span style="color: red;">■</span> q: Lachnospiraceae       |                                                                |
| <span style="color: red;">■</span> e: Bifidobacteriaceae   | <span style="color: red;">■</span> r: Peptostreptococcaceae |                                                                |
| <span style="color: red;">■</span> f: Bifidobacteriales    | <span style="color: green;">■</span> s: Faecalibacterium    |                                                                |
| <span style="color: red;">■</span> g: S24_7                | <span style="color: red;">■</span> t: Oscillospira          |                                                                |
| <span style="color: red;">■</span> h: Bacteroidales        | <span style="color: green;">■</span> u: Clostridiales       |                                                                |
| <span style="color: green;">■</span> i: Enterococcus       | <span style="color: red;">■</span> v: Burkholderia          |                                                                |
| <span style="color: red;">■</span> j: Enterococcaceae      | <span style="color: red;">■</span> w: Burkholderiaceae      |                                                                |
| <span style="color: green;">■</span> k: Lactobacillus      | <span style="color: red;">■</span> x: Burkholderiales       |                                                                |
| <span style="color: green;">■</span> l: Lactobacillaceae   | <span style="color: green;">■</span> y: Shewanella          |                                                                |
| <span style="color: green;">■</span> m: Lactobacillales    | <span style="color: green;">■</span> z: Shewanellaceae      |                                                                |

### Non-HRV challenged ileum

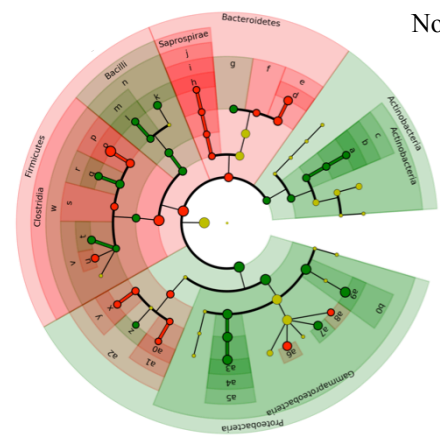

■ Deficient diet  
■ Sufficient diet

#### Abbreviations

- |                                                            |                                                             |                                                                |
|------------------------------------------------------------|-------------------------------------------------------------|----------------------------------------------------------------|
| <span style="color: green;">■</span> a: Bifidobacterium    | <span style="color: green;">■</span> n: Lactobacillales     | <span style="color: red;">■</span> a0: Ralstonia               |
| <span style="color: green;">■</span> b: Bifidobacteriaceae | <span style="color: red;">■</span> o: Clostridium           | <span style="color: red;">■</span> a1: Oxalobacteraceae        |
| <span style="color: green;">■</span> c: Bifidobacteriales  | <span style="color: red;">■</span> p: Clostridiaceae        | <span style="color: red;">■</span> a2: Burkholderiales         |
| <span style="color: red;">■</span> d: Bacteroides          | <span style="color: green;">■</span> q: Ruminococcus        | <span style="color: green;">■</span> a3: Shewanella            |
| <span style="color: red;">■</span> e: Bacteroidaceae       | <span style="color: green;">■</span> r: Lachnospiraceae     | <span style="color: green;">■</span> a4: Shewanellaceae        |
| <span style="color: red;">■</span> f: Rikenellaceae        | <span style="color: red;">■</span> s: Peptostreptococcaceae | <span style="color: green;">■</span> a5: Alteromonadales       |
| <span style="color: green;">■</span> g: S24_7              | <span style="color: green;">■</span> t: Faecalibacterium    | <span style="color: red;">■</span> a6: EnterobacteriaceaeOther |
| <span style="color: red;">■</span> h: Sediminibacterium    | <span style="color: red;">■</span> u: Oscillospira          | <span style="color: green;">■</span> a7: Proteus               |
| <span style="color: red;">■</span> i: Chitinophagaceae     | <span style="color: red;">■</span> v: Ruminococcaceae       | <span style="color: red;">■</span> a8: Tralbulsiella           |
| <span style="color: red;">■</span> j: Saprospirales        | <span style="color: green;">■</span> w: Clostridiales       | <span style="color: green;">■</span> a9: Halomonas             |
| <span style="color: green;">■</span> k: Enterococcus       | <span style="color: red;">■</span> x: Burkholderia          | <span style="color: green;">■</span> b0: Oceanospirillales     |
| <span style="color: green;">■</span> l: Lactobacillus      | <span style="color: red;">■</span> y: Burkholderiaceae      |                                                                |
| <span style="color: green;">■</span> m: Lactobacillaceae   | <span style="color: green;">■</span> z: Delftia             |                                                                |

### Non-HRV challenged colon

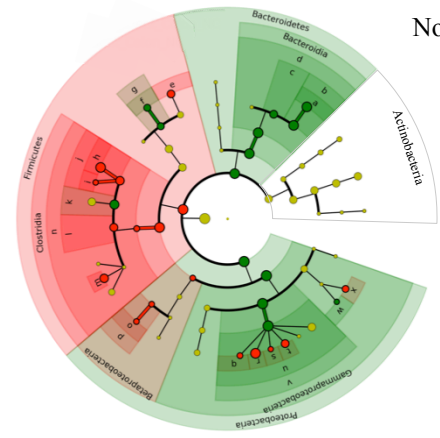

■ Deficient diet  
■ Sufficient diet

#### Abbreviations

- |                                                             |                                                               |
|-------------------------------------------------------------|---------------------------------------------------------------|
| <span style="color: green;">■</span> a: Bacteroides         | <span style="color: red;">■</span> n: Clostridiales           |
| <span style="color: green;">■</span> b: Bacteroidaceae      | <span style="color: red;">■</span> o: Burkholderia            |
| <span style="color: green;">■</span> c: Rikenellaceae       | <span style="color: red;">■</span> p: Burkholderiaceae        |
| <span style="color: green;">■</span> d: Bacteroidales       | <span style="color: red;">■</span> q: Citrobacter             |
| <span style="color: red;">■</span> e: Enterococcus          | <span style="color: red;">■</span> r: EnterobacteriaceaeOther |
| <span style="color: green;">■</span> f: Lactobacillus       | <span style="color: red;">■</span> s: Pantoea                 |
| <span style="color: green;">■</span> g: Lactobacillaceae    | <span style="color: red;">■</span> t: Proteus                 |
| <span style="color: red;">■</span> h: Clostridium           | <span style="color: green;">■</span> u: Enterobacteriaceae    |
| <span style="color: red;">■</span> i: SMB53                 | <span style="color: green;">■</span> v: Enterobacteriales     |
| <span style="color: red;">■</span> j: Clostridiaceae        | <span style="color: green;">■</span> w: CandidatusPortiera    |
| <span style="color: green;">■</span> k: Lachnospiraceae     | <span style="color: red;">■</span> x: Halomonas               |
| <span style="color: red;">■</span> l: Peptostreptococcaceae |                                                               |
| <span style="color: red;">■</span> m: Oscillospira          |                                                               |
