# Supplementary material for: Impact of nutrition and rotavirus infection on the infant gut microbiota in a humanized pig model
Source: Springer Nature journal article supplement (doi:10.1186/s12876-018-0810-2), 2018-06-22

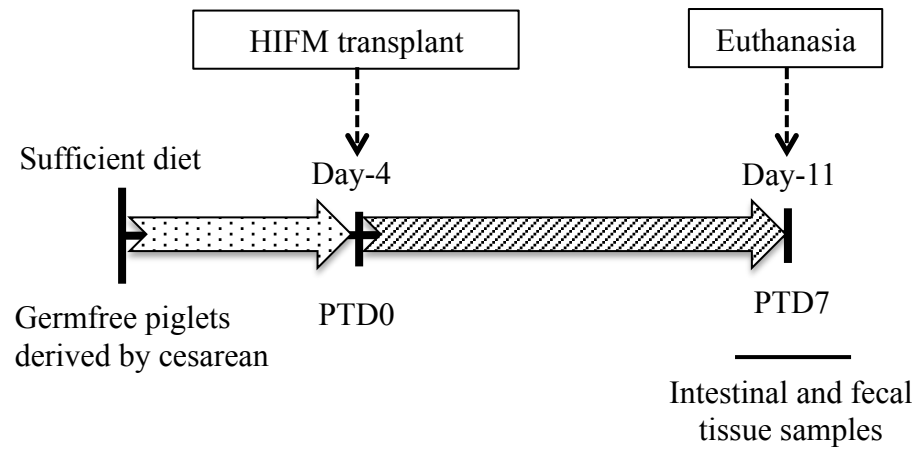

Supplement: MOESM1 [file 15867436]
