# Supplementary material for: Impact of nutrition and rotavirus infection on the infant gut microbiota in a humanized pig model
Source: Springer Nature journal article supplement (doi:10.1186/s12876-018-0810-2), 2018-06-22
Supplement: MOESM5 [file 15867436]

### Non-HRV challenged liver

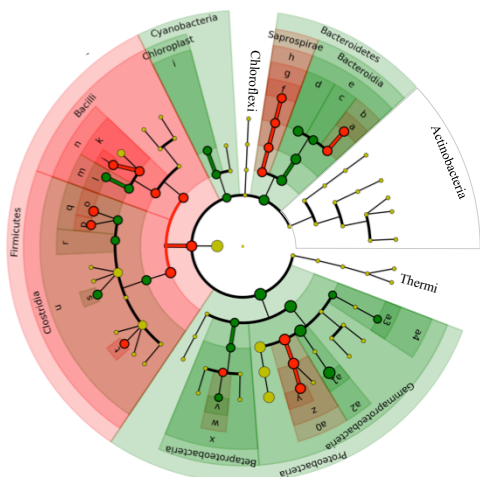

█ Deficient diet  
█ Sufficient diet

#### Abbreviations

- |                                                          |                                                               |                                                            |
|----------------------------------------------------------|---------------------------------------------------------------|------------------------------------------------------------|
| <span style="color: red;">█</span> a: Bacteroides        | <span style="color: red;">█</span> n: Lactobacillales         | <span style="color: red;">█</span> a0: Enterobacteriales   |
| <span style="color: red;">█</span> b: Bacteroidaceae     | <span style="color: red;">█</span> o: ClostridiaceaeOther     | <span style="color: green;">█</span> a1: Halomonas         |
| <span style="color: green;">█</span> c: Rikenellaceae    | <span style="color: red;">█</span> p: Clostridium             | <span style="color: green;">█</span> a2: Oceanospirillales |
| <span style="color: green;">█</span> d: S24_7            | <span style="color: green;">█</span> q: Clostridiaceae        | <span style="color: green;">█</span> a3: Stenotrophomonas  |
| <span style="color: green;">█</span> e: Bacteroidales    | <span style="color: green;">█</span> r: ClostridialesOther    | <span style="color: green;">█</span> a4: Xanthomonadales   |
| <span style="color: red;">█</span> f: Sediminibacterium  | <span style="color: green;">█</span> s: Ruminococcus          |                                                            |
| <span style="color: red;">█</span> g: Chitinophagaceae   | <span style="color: red;">█</span> t: Faecalibacterium        |                                                            |
| <span style="color: red;">█</span> h: Saprospirales      | <span style="color: green;">█</span> u: Clostridiales         |                                                            |
| <span style="color: green;">█</span> i: Streptophyta     | <span style="color: green;">█</span> v: Delftia               |                                                            |
| <span style="color: red;">█</span> j: Enterococcus       | <span style="color: red;">█</span> w: Comamonadaceae          |                                                            |
| <span style="color: red;">█</span> k: Enterococcaceae    | <span style="color: green;">█</span> x: Burkholderiales       |                                                            |
| <span style="color: green;">█</span> l: Lactobacillus    | <span style="color: red;">█</span> y: EnterobacteriaceaeOther |                                                            |
| <span style="color: green;">█</span> m: Lactobacillaceae | <span style="color: red;">█</span> z: Enterobacteriaceae      |                                                            |

### Non-HRV challenged MLN

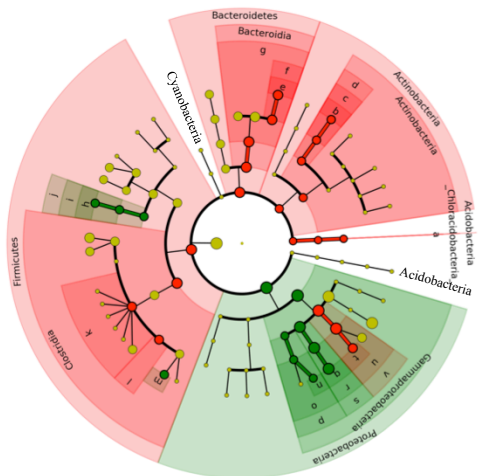

█ Deficient diet  
█ Sufficient diet

#### Abbreviations

- |                                                             |                                                               |
|-------------------------------------------------------------|---------------------------------------------------------------|
| <span style="color: red;">█</span> a: RB41                  | <span style="color: green;">█</span> n: Succinivibrio         |
| <span style="color: red;">█</span> b: Bifidobacterium       | <span style="color: green;">█</span> o: Succinivibrionaceae   |
| <span style="color: red;">█</span> c: Bifidobacteriaceae    | <span style="color: green;">█</span> p: Aeromonadales         |
| <span style="color: red;">█</span> d: Bifidobacteriales     | <span style="color: green;">█</span> q: Shewanella            |
| <span style="color: red;">█</span> e: Bacteroides           | <span style="color: green;">█</span> r: Shewanellaceae        |
| <span style="color: red;">█</span> f: Bacteroidaceae        | <span style="color: green;">█</span> s: Alteromonadales       |
| <span style="color: red;">█</span> g: Bacteroidales         | <span style="color: red;">█</span> t: Enterobacteriaceaeother |
| <span style="color: green;">█</span> h: Turicibacter        | <span style="color: red;">█</span> u: Enterobacteriaceae      |
| <span style="color: green;">█</span> i: Turicibacteraceae   | <span style="color: red;">█</span> v: Enterobacteriales       |
| <span style="color: green;">█</span> j: Turicibacteriales   |                                                               |
| <span style="color: red;">█</span> k: Lachnospiraceae       |                                                               |
| <span style="color: red;">█</span> l: Peptostreptococcaceae |                                                               |
| <span style="color: green;">█</span> m: Faecalibacterium    |                                                               |
